# Supplementary material for: NeuroMorphoVis: a collaborative framework for analysis and visualization of neuronal morphology skeletons reconstructed from microscopy stacks
Source: PubMed Central journal article supplement — Bioinformatics. 2018 Jun 27;34(13):i574–82. doi: 10.1093/bioinformatics/bty231 (PMC6022592; doi:10.1093/bioinformatics/bty231), 2018-06-27
Supplement: bty231_abdellah.11.supplementary.pdf [file bty231_abdellah.11.supplementary.pdf]

# NeuroMorphoVis: a framework for analysis and visualization of neuronal morphology skeletons reconstructed from microscopy stacks

Supplementary information

Marwan Abdellah\*    Juan Hernando    Stefan Eilemann    Samuel Lapere  
Nicolas Antille    Henry Markram    Felix Schürmann<sup>†</sup>

March 22, 2018

---

\*marwan.abdellah@epfl.ch

†felix.schuermann@epfl.ch

# 1 Supplementary figures

## 1.1 Figure S1

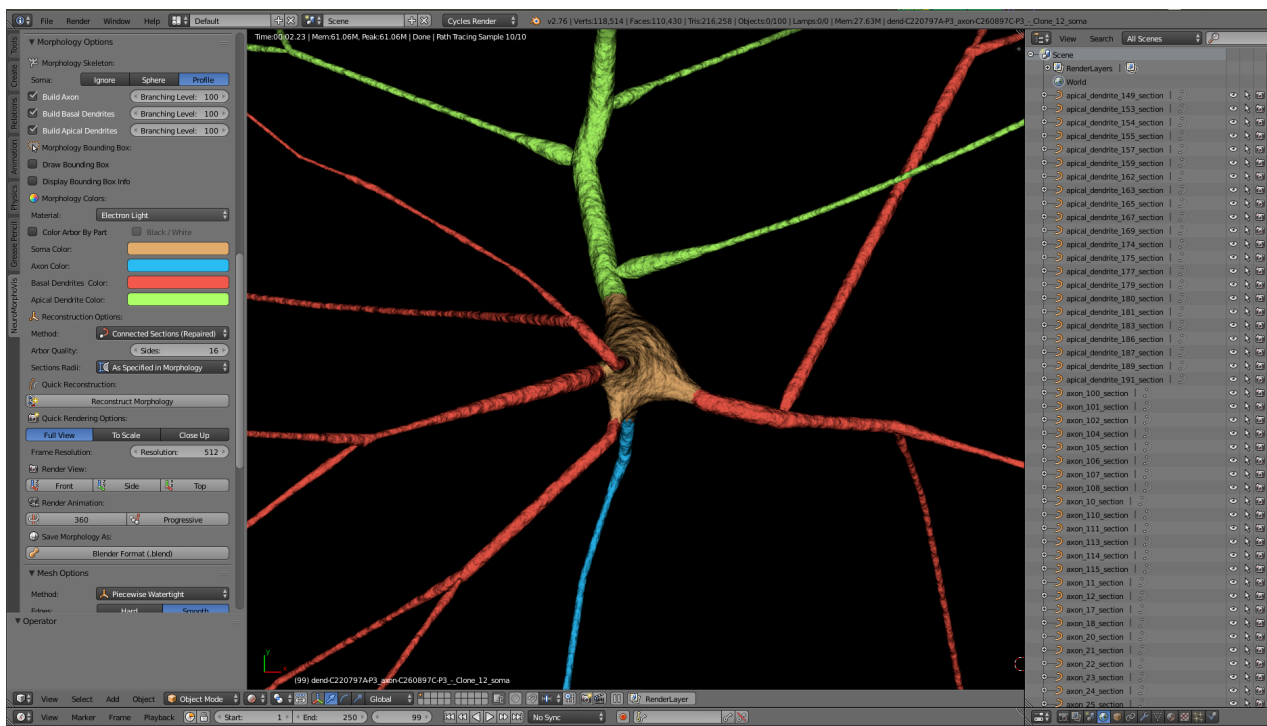

Figure S1: The user interface of NeuroMorphoVis.

## 1.2 Figure S2

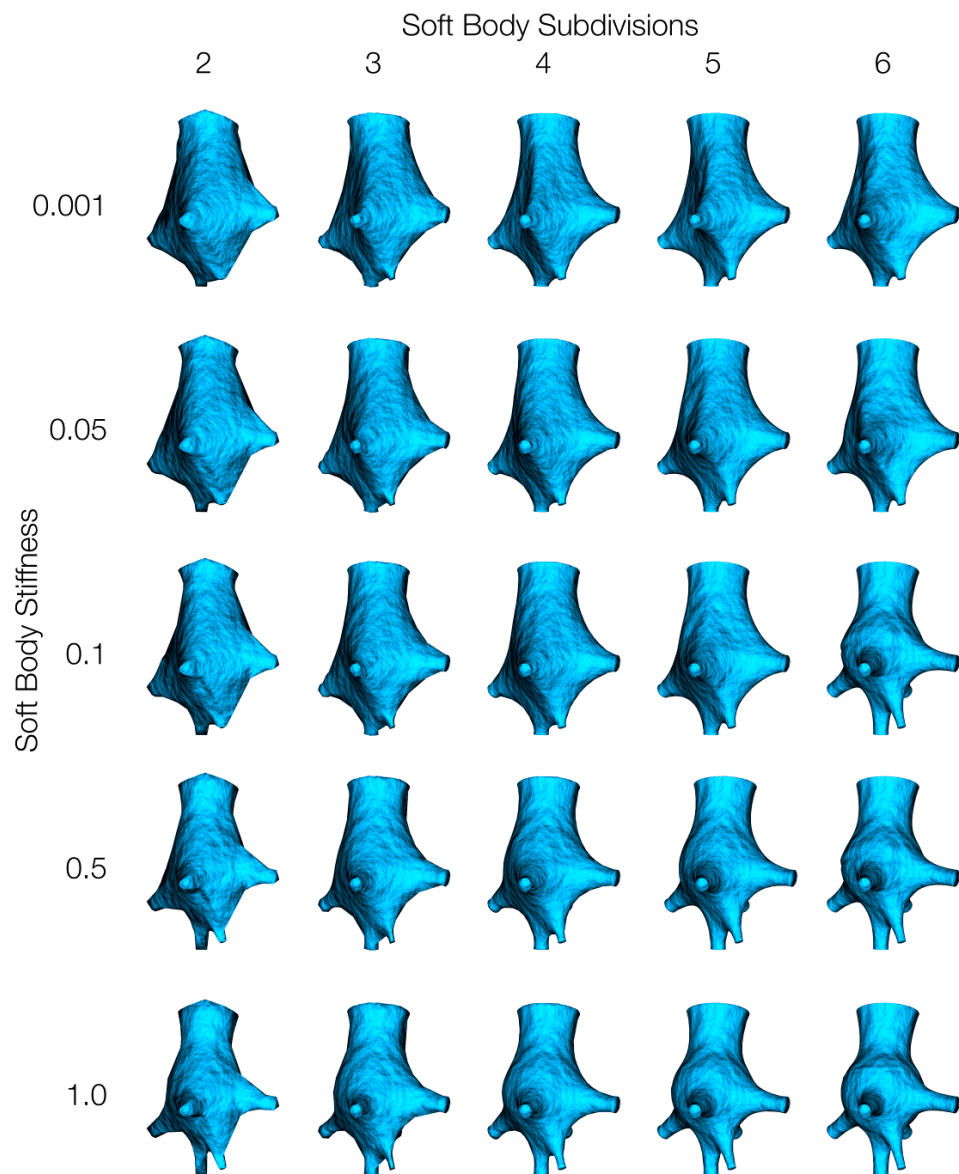

Figure S2: The effect of varying the parameters of the soma reconstruction module, mainly the number of soft body subdivisions and stiffness, is visually demonstrated on a layer 5 pyramidal neuron.

### 1.3 Figure S3

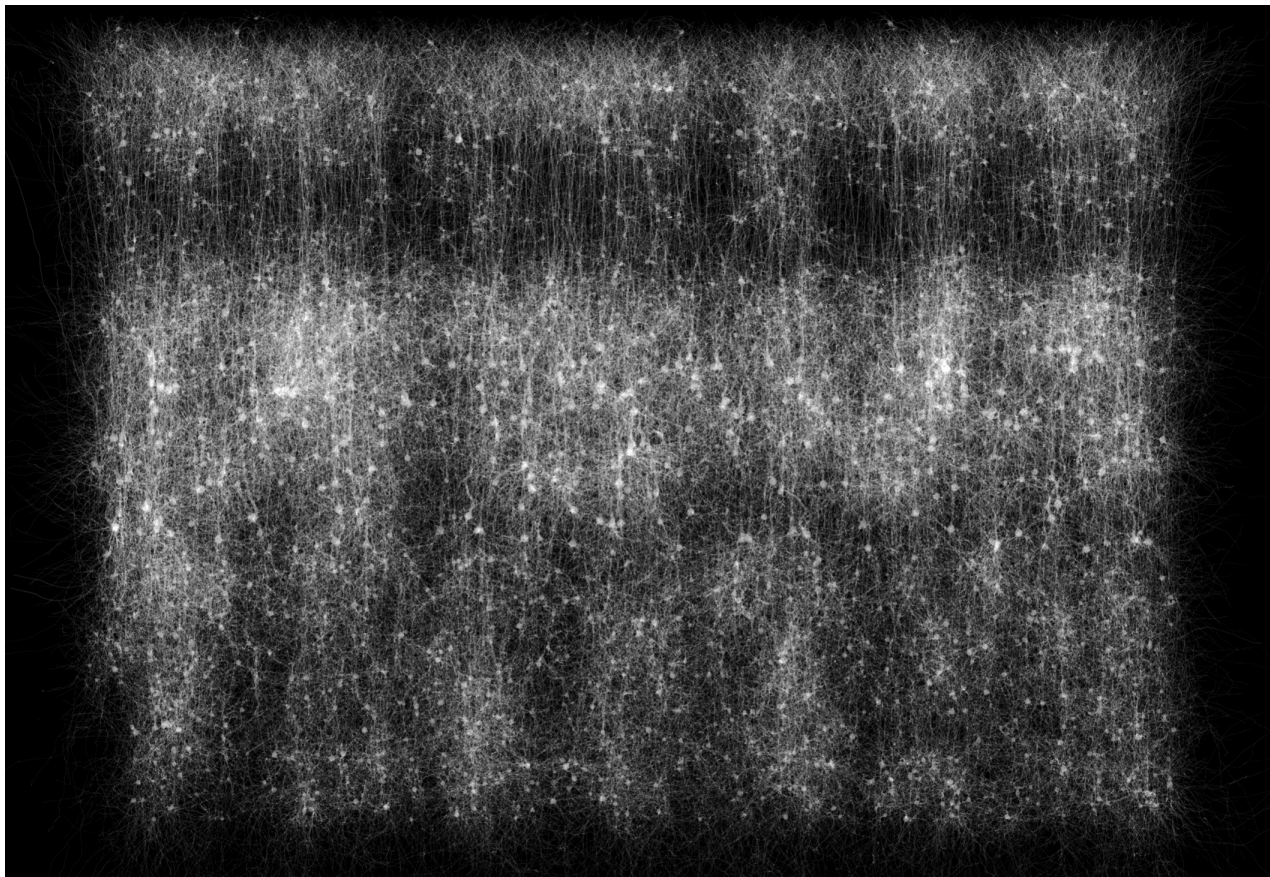

Figure S3: A fraction of 10% of a mesoscale circuit that is composed of 100,000 neurons reflecting a digital slice extracted from the somatosensory cortex of rat brain.

## **2 Supplementary videos**

### **2.1 Video V1**

<https://www.youtube.com/watch?v=v02HogkFODU>

### **2.2 Video V2**

<https://www.youtube.com/watch?v=74PGirMx3ks&t=74s>

### **2.3 Video V3**

<https://www.youtube.com/watch?v=oxCKwrZSV98>

## 3 NeuroMorphoVis Installation

NeuroMorphoVis is an add-on that can be installed in Blender following the normal procedure of loading add-ons to the user interface via Blender User Preferences panel. In this section, we will demonstrate how to download and install it into Blender.

### 3.1 Dependencies

1. Blender 2.67, 2.77 or 2.78
2. HDF5 library, that can be installed on Ubuntu via `sudo apt-get install python-h5` for python 2.7 or `sudo apt-get install python3-h5` for python 3. This dependency is only requested if the user want to load `.h5` morphologies only.

### 3.2 Repository

The framework is available under the GNU license at <https://github.com/BlueBrain/NeuroMorphoVis>.

### 3.3 Installation

The users can install Blender on Debian operating systems using `sudo apt-get install blender` or download a free version online from the [Blender website](#).

For a system-installed Blender on Linux, the add-on can be cloned into the addons directory in the user home space as follows

1. Open the directory `$HOME/.config/blender/2.76/scripts/addons/`.
2. Clone the repository `git clone https://github.com/BlueBrain/NeuroMorphoVis.git`.
3. Open Blender from the terminal using the command `blender`.
4. Open the User Preferences panel from the File menu, as shown in Figure [S5](#).
5. Open the Add-ons tab and select NeuroMorphoVis, see Figure [S4](#).
6. Select a morphology file and start processing it using the different modules of the tool shown in Figure [S6](#).

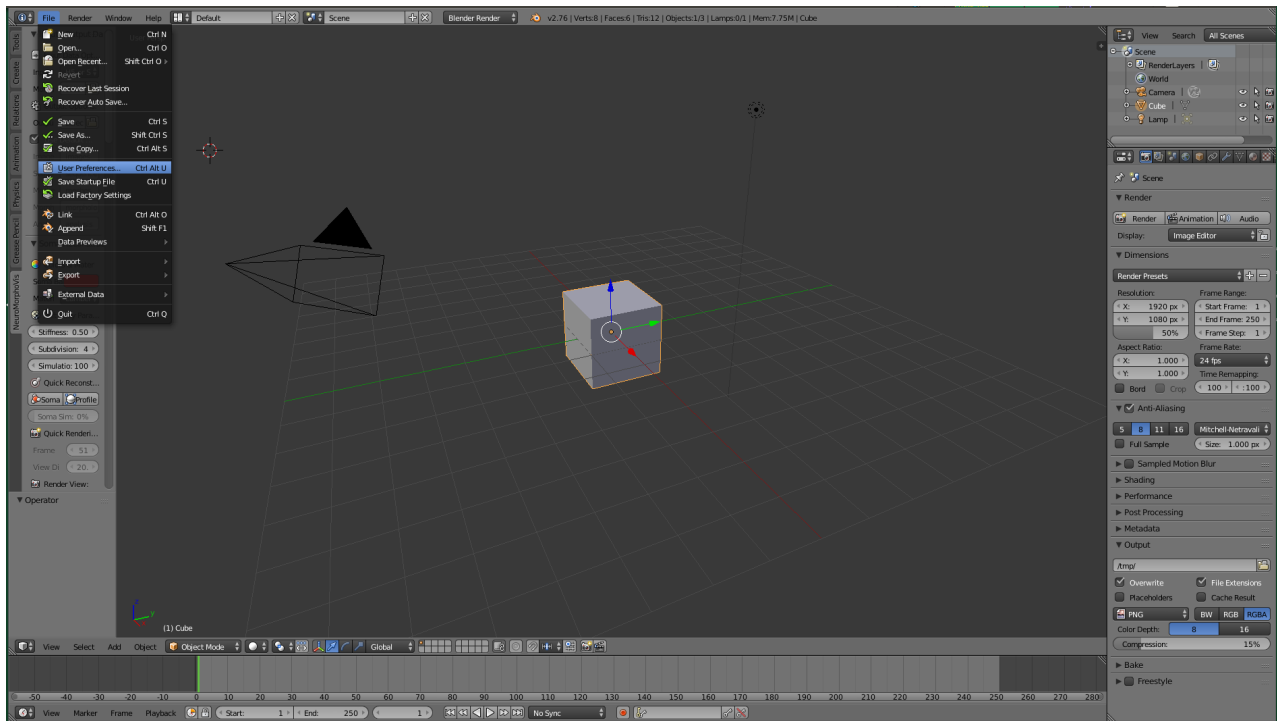

Figure S4: Opening the user preferences panel in Blender from the File menu.

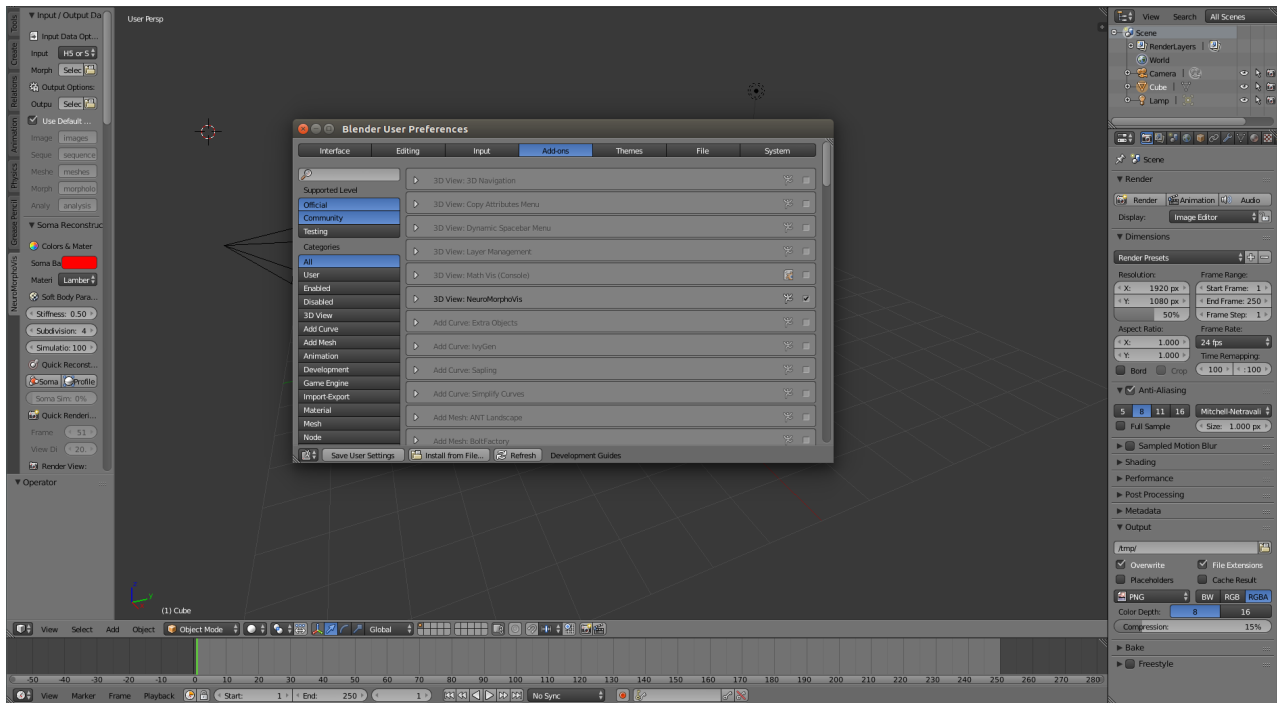

Figure S5: Loading the NeuroMorphoVis add-on from the Blender Add-ons panel.



## Morphology Reconstruction & Analysis

### Soma Reconstruction & Analysis

### Input & Output Data

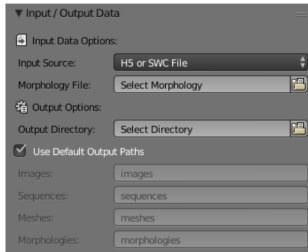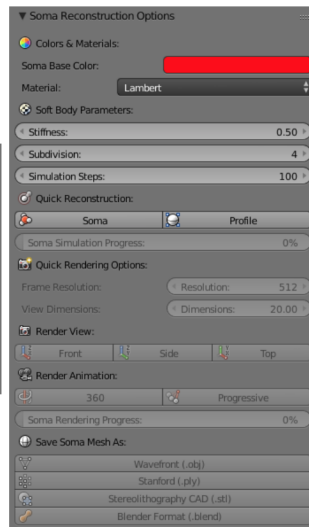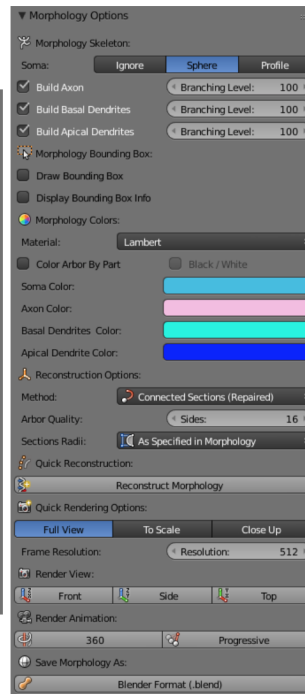

### Mesh Reconstruction

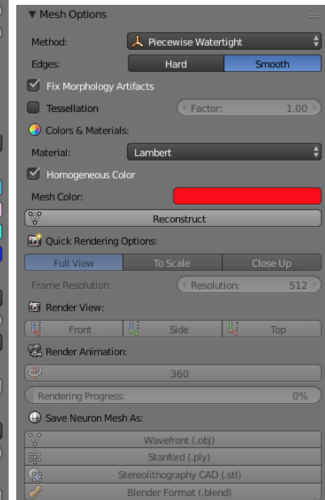

Figure S6: The interface of the different modules of NeuroMorphoVis.
